# Supplementary material for: Breathomics for the clinician: the use of volatile organic compounds in respiratory diseases
Source: HighWire-hosted journal article supplement (doi:10.1136/thoraxjnl-2020-215667), 2021-01-07
Supplement: thoraxjnl-2020-215667supp001_data_supplement.pdf [file thoraxjnl-2020-215667supp001_data_supplement.pdf]

| Functional group | Structure formula                                                                   | Class of compound | Example                                                                                              |
|------------------|-------------------------------------------------------------------------------------|-------------------|------------------------------------------------------------------------------------------------------|
| Amino            | -NH <sub>2</sub>                                                                    | Amines            | 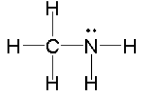<br>Methylamine   |
| Carbonyl         | -CHO                                                                                | Aldehydes         | <br>Acetaldehyde  |
| Carbonyl         | -CO                                                                                 | Ketone            | <br>Acetone      |
| Carboxyl         | R-COOH                                                                              | Carboxylic acid   | <br>Acetic acid |
| Hydroxyl         | R-OH                                                                                | Alcohols          | <br>Ethanol     |
| Phenyl           |  | Cyclic/aromatic   | <br>Benzyl      |

Table 1: A breakdown of various functional groups and their structure formulas
