# Supplementary material for: Breathomics for the clinician: the use of volatile organic compounds in respiratory diseases
Source: HighWire-hosted journal article supplement (doi:10.1136/thoraxjnl-2020-215667), 2021-01-07
Supplement: thoraxjnl-2020-215667supp002_data_supplement.pdf [file thoraxjnl-2020-215667supp002_data_supplement.pdf]

| Compound and chemical classification | Author                                    | Disease                         | Participants (N=) | Concentration change | Analytical technology |
|--------------------------------------|-------------------------------------------|---------------------------------|-------------------|----------------------|-----------------------|
| <b>Aldehydes</b>                     |                                           |                                 |                   |                      |                       |
| 2-oxoglutaric acid semi-aldehyde     | Bregy <i>et al</i> <sup>60</sup>          | COPD                            | 36                | ↑                    | SESI-MS               |
| aspartic acid semi-aldehyde          | Bregy <i>et al</i> <sup>60</sup>          | COPD                            | 36                | ↑                    | SESI-MS               |
| Nonanal                              | Basanta <i>et al</i> <sup>67</sup>        | COPD                            | 71                | ↑                    | GC-TOF-MS             |
| Nonanal                              | Callol-Sanchez <i>et al</i> <sup>90</sup> | Lung cancer                     | 210               | ↑                    | GC-Tof-MS             |
| Nonanal                              | Schleich <i>et al</i> <sup>63</sup>       | Asthma                          | 521               | ↑                    | GC-MS                 |
| Nonanal                              | Schleich <i>et al</i> <sup>63</sup>       | Asthma                          | 521               | ↑                    | GC-MS                 |
| Nonanal                              | Fowler <i>et al</i> <sup>73</sup>         | Ventilator associated pneumonia | 46                | ↑                    | TD/GC-Tof-MS          |
| Pentadecanal                         | Basanta <i>et al</i> <sup>67</sup>        | COPD                            | 71                | ↑                    | GC-TOF-MS             |
| Pentadecanal                         | Ibrahim <i>et al</i> <sup>106</sup>       | Asthma                          | 58                | ↓                    | GC-MS                 |
| Tetradecanal                         | Schnabel <i>et al</i> <sup>107</sup>      | Ventilator associated pneumonia | 100               | ↑                    | GC-Tof-MS             |
| Undecanal                            | Basanta <i>et al</i> <sup>67</sup>        | COPD                            | 71                | ↑                    | GC-TOF-MS             |
| Acrolein                             | Schnabel <i>et al</i> <sup>107</sup>      | Ventilator associated pneumonia | 100               | ↓                    | GC-Tof-MS             |
| <b>Esters</b>                        |                                           |                                 |                   |                      |                       |
| Ethyl 2,2-dimethylacetoacetate       | Ibrahim <i>et al</i> <sup>106</sup>       | Asthma                          | 58                | ↑                    | GC-MS                 |
| Linalylacetate                       | Gaida <i>et al</i> <sup>62</sup>          | COPD                            | 190               | ↑                    | TD-GC-MS              |
|                                      |                                           |                                 |                   |                      |                       |

|                              |                                      |                                 |     |   |              |
|------------------------------|--------------------------------------|---------------------------------|-----|---|--------------|
| <b>Ketones</b>               |                                      |                                 |     |   |              |
| 2-butanone                   | Ibrahim <i>et al</i> <sup>106</sup>  | Asthma                          | 58  | ↑ | GC-MS        |
| 2-hexanone                   | Schleich <i>et al</i> <sup>63</sup>  | Asthma                          | 521 | ↓ | GC-MS        |
| 2-pentanone                  | Allers <i>et al</i> <sup>108</sup>   | COPD                            | 58  | ↑ | GC-APCI-MS   |
| 2-pentanone                  | Pizzini <i>et al</i> <sup>61</sup>   | COPD                            | 54  | ↑ | TD-GC-ToF-MS |
| 4-heptanone                  | Pizzini <i>et al</i> <sup>61</sup>   | COPD                            | 54  | ↑ | TD-GC-ToF-MS |
| 6-methyl-5-hepten-2-one      | Pizzini <i>et al</i> <sup>61</sup>   | COPD                            | 54  | ↓ | TD-GC-ToF-MS |
| Acetone                      | Martinez <i>et al</i> <sup>109</sup> | COPD                            | 61  | ↑ | GC-IMS       |
| Cyclohexanone                | Pizzini <i>et al</i> <sup>61</sup>   | COPD                            | 54  | ↑ | TD-GC-ToF-MS |
| Cyclohexanone (CAS 108-94-1) | Westhoff <i>et al</i> <sup>110</sup> | COPD                            |     | ↑ | GC-IMS       |
| 2-methyl cyclopentanone      | Fowler <i>et al</i> <sup>73</sup>    | Ventilator associated pneumonia | 46  | ↑ | TD-GC-ToF-MS |
| <b>Organic acids</b>         |                                      |                                 |     |   |              |
| 11-hydroxyundecanoic acid    | Bregy <i>et al</i> <sup>60</sup>     | COPD                            | 36  | ↓ | SESI-MS      |
| Acetic acid                  | Phillips <i>et al</i> <sup>20</sup>  | COPD                            | 182 | ↑ | GC-MS        |
| Butanoic acid                | Basanta <i>et al</i> <sup>67</sup>   | COPD                            | 71  | ↓ | GC-TOF-MS    |
| Dodecanedioic acid           | Bregy <i>et al</i> <sup>60</sup>     | COPD                            | 36  | ↓ | SESI-MS      |
| Oxoheptadecanoic acid        | Bregy <i>et al</i> <sup>60</sup>     | COPD                            | 36  | ↓ | SESI-MS      |
| Pentanoic acid               | Basanta <i>et al</i> <sup>67</sup>   | COPD                            | 71  | ↓ | GC-TOF-MS    |
|                              |                                      |                                 |     |   |              |

|                           |                                        |                                 |     |   |             |
|---------------------------|----------------------------------------|---------------------------------|-----|---|-------------|
| <b>Alkanes</b>            |                                        |                                 |     |   |             |
| 3,7-dimethylnonane        | Schleich <i>et al</i> <sup>63</sup>    | Asthma                          | 521 | ↓ | GC-MS       |
| Hexane                    | Schleich <i>et al</i> <sup>63</sup>    | Asthma                          | 521 | ↓ | GC-MS       |
| Undecane                  | Schleich <i>et al</i> <sup>63</sup>    | Asthma                          | 521 | ↑ | GC-MS       |
| 2,6-Dimethyl-heptane      | Van Berkel <i>et al</i> <sup>111</sup> | COPD                            | 79  | ↑ | GC-Tof-MS   |
| 4,7-Dimethyl-undecane     | Van Berkel <i>et al</i> <sup>111</sup> | COPD                            | 79  | ↑ | GC-Tof-MS   |
| 4-Methyl-octane           | Van Berkel <i>et al</i> <sup>111</sup> | COPD                            | 79  | ↑ | GC-Tof-MS   |
| Hexadecane                | Van Berkel <i>et al</i> <sup>111</sup> | COPD                            | 79  | ↑ | GC-Tof-MS   |
| 6-ethyl-2-methyl-Decane   | Cazzola <i>et al</i> <sup>112</sup>    | COPD                            | 34  | ↑ | SPME- GC-MS |
| Decane                    | Cazzola <i>et al</i> <sup>112</sup>    | COPD                            | 34  | ↑ | SPME- GC-MS |
| Hexane, 3-ethyl-4-methyl- | Cazzola <i>et al</i> <sup>112</sup>    | COPD                            | 34  | ↓ | SPME- GC-MS |
| 2 methyl-decane           | Ibrahim <i>et al</i> <sup>106</sup>    | Asthma                          | 58  | ↑ | GC-MS       |
| 2,6,10-trimethyl-dodecane | Ibrahim <i>et al</i> <sup>106</sup>    | Asthma                          | 58  | ↑ | GC-MS       |
| 2,6,11-trimethyl-dodecane | Ibrahim <i>et al</i> <sup>106</sup>    | Asthma                          | 58  | ↑ | GC-MS       |
| 5,5-Dibutylnonane         | Ibrahim <i>et al</i> <sup>106</sup>    | Asthma                          | 58  | ↓ | GC-MS       |
| Dodecane                  | Schnabel <sup>107</sup>                | Ventilator associated pneumonia | 100 | ↓ | GC-Tof-MS   |
| Tetradecane               | Schnabel <sup>107</sup>                | Ventilator associated pneumonia | 100 | ↑ | GC-Tof-MS   |
| Pentane                   | Olopade <i>et al</i> <sup>56</sup>     | Asthma                          | 40  | ↑ | GC-MS       |

|                                |                                        |                                 |     |   |              |
|--------------------------------|----------------------------------------|---------------------------------|-----|---|--------------|
| Ethane                         | Paredi <i>et al</i> <sup>113</sup>     | Asthma                          | 40  | ↑ | GC-MS        |
| Butane                         | Phillips <i>et al</i> <sup>20</sup>    | COPD                            | 182 | — | GC-MS        |
| Butane                         | Schnabel <i>et al</i> <sup>107</sup>   | Ventilator associated pneumonia | 100 | ↑ | GC-Tof-MS    |
| 2,4-dimethylheptane            | Pizzini <i>et al</i> <sup>61</sup>     | COPD                            | 54  | ↓ | TD-GC-ToF-MS |
| 2,6-dimethyloctane             | Pizzini <i>et al</i> <sup>61</sup>     | COPD                            | 54  | ↓ | TD-GC-ToF-MS |
| 2-methylhexane                 | Pizzini <i>et al</i> <sup>61</sup>     | COPD                            | 54  | ↑ | TD-GC-ToF-MS |
| cyclohexane                    | Pizzini <i>et al</i> <sup>61</sup>     | COPD                            | 54  | ↑ | TD-GC-ToF-MS |
| n-butane                       | Pizzini <i>et al</i> <sup>61</sup>     | COPD                            | 54  | ↓ | TD-GC-ToF-MS |
| n-Heptane                      | Pizzini <i>et al</i> <sup>61</sup>     | COPD                            | 54  | ↑ | TD-GC-ToF-MS |
| Heptane                        | Schnabel <i>et al</i> <sup>107</sup>   | Ventilator associated pneumonia | 100 | ↑ | GC-Tof-MS    |
| Heptane                        | Fowler <i>et al</i> <sup>73</sup>      | Ventilator associated pneumonia | 46  | ↓ | GC-Tof-MS    |
| <b>Alkenes</b>                 |                                        |                                 |     |   |              |
| 3- tetradecene                 | Schleich <i>et al</i> <sup>63</sup>    | Asthma                          | 521 | ↑ | GC-MS        |
| Pentadecene                    | Schleich <i>et al</i> <sup>63</sup>    | Asthma                          | 521 | ↑ | GC-MS        |
| Isoprene                       | Van Berkel <i>et al</i> <sup>111</sup> | COPD                            | 79  | ↑ | GC-Tof-MS    |
| Isoprene                       | Phillips <i>et al</i> <sup>20</sup>    | COPD                            | 182 | — | GC-MS        |
| 1-Pentene, 2,4,4-trimethyl-    | Cazzola <i>et al</i> <sup>112</sup>    | COPD                            | 34  | ↓ | SPME – GC-MS |
| 1,6-Dimethyl-1,3,5-heptatriene | Gaida <i>et al</i> <sup>62</sup>       | COPD                            | 190 | — | GC-MS        |

|                                             |                                      |                                 |     |   |              |
|---------------------------------------------|--------------------------------------|---------------------------------|-----|---|--------------|
| 3,5-heptatriene                             | Gaida <i>et al</i> <sup>62</sup>     | COPD                            | 190 | — | GC-MS        |
| 4-ethyl-o-xylene                            | Ibrahim <i>et al</i> <sup>106</sup>  | Asthma                          | 58  | ↓ | GC-MS        |
| Nonadecane                                  | Phillips <i>et al</i> <sup>20</sup>  | COPD                            | 182 | — | GC-MS        |
| <b>Monoaromatics</b>                        |                                      |                                 |     |   |              |
| Benzene, 1,3,5-tri-tert-butyl-              | Cazzola <i>et al</i> <sup>112</sup>  | COPD                            | 34  | ↓ | SPME – GC-MS |
| 1-Ethyl-3-methyl benzene                    | Gaida <i>et al</i> <sup>62</sup>     | COPD                            | 190 | ↑ | GC-MS        |
| Benzene                                     | Phillips <i>et al</i> <sup>20</sup>  | COPD                            | 182 | — | GC-MS        |
| Ethylbenzene                                | Schnabel <i>et al</i> <sup>107</sup> | Ventilator associated pneumonia | 100 | ↑ | GC-Tof-MS    |
| <b>Terpenes</b>                             |                                      |                                 |     |   |              |
| Limonene                                    | Cazzola <i>et al</i> <sup>112</sup>  | COPD                            | 34  | ↓ | SPME – GC-MS |
| Terpinolene                                 | Ibrahim <i>et al</i> <sup>106</sup>  | Asthma                          | 58  | ↑ | GC-MS        |
| <b>Alcohols</b>                             |                                      |                                 |     |   |              |
| Cyclohexanol                                | Basanta <i>et al</i> <sup>67</sup>   | COPD                            | 71  | ↑ | GC-TOF-MS    |
| Bicyclo[2.2.2]octan-1-ol, 4-methyl - C9H16O | Brinkman <i>et al</i> <sup>104</sup> | Asthma                          | 23  | ↑ | GC-MS        |
| Methanol CH3OH                              | Brinkman <i>et al</i> <sup>104</sup> | Asthma                          | 23  | ↑ | GC-MS        |
| 2-Propanol                                  | Cazzola <i>et al</i> <sup>112</sup>  | COPD                            | 34  | ↓ | SPME – GC-MS |
| Phenole                                     | Gaida <i>et al</i> <sup>62</sup>     | COPD                            | 190 | ↑ | GC-MS        |
| 2-butylcyclohexanol                         | Ibrahim <i>et al</i> <sup>106</sup>  | Asthma                          | 58  | ↓ | GC-MS        |

|                           |                                      |                                 |     |   |              |
|---------------------------|--------------------------------------|---------------------------------|-----|---|--------------|
| Ethanol                   | Schnabel <i>et al</i> <sup>107</sup> | Ventilator associated pneumonia | 100 | ↑ | GC-ToF-MS    |
| Isopropyl Alcohol         | Schnabel <i>et al</i> <sup>107</sup> | Ventilator associated pneumonia | 100 | ↓ | GC-ToF-MS    |
| Benzyl alcohol            | Ibrahim <i>et al</i> <sup>106</sup>  | Asthma                          | 58  | ↑ | GC-MS        |
| 1-propanol                | Schleich <i>et al</i> <sup>63</sup>  | Asthma                          | 521 | ↓ | GC-MS        |
| 1-propanol                | Van Oort <i>et al</i> <sup>74</sup>  | Pneumonia                       | 93  | ↑ | GC-MS        |
| <b>Phenol derivatives</b> |                                      |                                 |     |   |              |
| Butylated hydroxytoluene  | Cazzola <i>et al</i> <sup>112</sup>  | COPD                            | 34  | ↓ | SPME – GC-MS |
| m/p-Cresol,               | Gaida <i>et al</i> <sup>62</sup>     | COPD                            | 190 | — | GC-MS        |
| <b>Sulphides</b>          |                                      |                                 |     |   |              |
| Phthalic anhydride        | Phillips <i>et al</i> <sup>20</sup>  | COPD                            | 182 | — | GC-MS        |
| Sulphur dioxide           | Phillips <i>et al</i> <sup>20</sup>  | COPD                            | 182 | — | GC-MS        |
| dimethyl disulfide        | Pizzini <i>et al</i> <sup>61</sup>   | COPD                            | 54  | — | TD-GC-ToF-MS |
| methyl propyl sulfide     | Pizzini <i>et al</i> <sup>61</sup>   | COPD                            | 54  | ↑ | TD-GC-ToF-MS |
| <b>Permanent gases</b>    |                                      |                                 |     |   |              |
| Ethyl 4-nitrobenzoate     | Ibrahim <i>et al</i> <sup>106</sup>  | Asthma                          | 58  | ↓ | GC-MS        |
| Indole                    | Martinez <i>et al</i> <sup>109</sup> | COPD                            | 61  | ↑ | GC-IMS       |
| Indole                    | Gaida <i>et al</i> <sup>62</sup>     | COPD                            | 190 | — | GC-MS        |
| <b>Heterocycles</b>       |                                      |                                 |     |   |              |
| Oxirane-dodecyl           | Basanta <i>et al</i> <sup>67</sup>   | COPD                            | 71  | — | GC-TOF-MS    |

|                                                 |                                         |                                 |     |   |                                                                         |
|-------------------------------------------------|-----------------------------------------|---------------------------------|-----|---|-------------------------------------------------------------------------|
| $\gamma$ -hydroxy-L-homoarginine                | Bregy <i>et al</i> <sup>60</sup>        | COPD                            | 36  | ↑ | SESI-MS                                                                 |
| <b>Nitriles</b>                                 |                                         |                                 |     |   |                                                                         |
| Ace-tonitrile - C <sub>2</sub> H <sub>3</sub> N | Brinkman <i>et al</i> <sup>104</sup>    | Asthma                          | 23  | ↑ | GC-MS                                                                   |
| Hexyl ethylphosphonofluoridate                  | Cazzola <i>et al</i> <sup>114</sup>     | COPD                            | 34  | ↓ | SPME – GC-MS                                                            |
| <b>Furans</b>                                   |                                         |                                 |     |   |                                                                         |
| 2-pentylfuran                                   | Basanta <i>et al</i> <sup>67</sup>      | COPD                            | 71  | ↑ | GC-Tof-MS                                                               |
| Tetrahydro-Furan                                | Schnabel <i>et al</i> <sup>107</sup>    | Ventilator associated pneumonia | 100 | ↓ | GC-Tof-MS                                                               |
| <b>Others</b>                                   |                                         |                                 |     |   |                                                                         |
| 2,6-Di-tert-butylquinone                        | Ibrahim <i>et al</i> <sup>106</sup>     | Asthma                          | 58  | ↓ | GC-MS                                                                   |
| 3,4-Dihydroxybenzotrile                         | Ibrahim <i>et al</i> <sup>106</sup>     | Asthma                          | 58  | ↑ | GC-MS                                                                   |
| Allyl methyl sulphide                           | Ibrahim <i>et al</i> <sup>106</sup>     | Asthma                          | 58  | ↑ | GC-MS                                                                   |
| <b>2'-Aminoacetophenone</b>                     | Scott Thomas <i>et al</i> <sup>85</sup> | Cystic Fibrosis                 | 46  | ↑ | SPME – (GCMS)                                                           |
| Hexafluoroisopropanol                           | Van Oort <i>et al</i> <sup>74</sup>     | Pneumonia                       | 93  | ↓ | GC-MS – compound considered by authors to be likely exogenous in origin |

Table2: Summary of VOC biomarkers in various respiratory conditions from key breath studies and their reported concentration changes.

### **Additional References**

106. Ibrahim B, Basanta M, Cadden P, et al. Non-invasive phenotyping using exhaled volatile organic compounds in asthma. *Thorax* 2011; **66**(9): 804-9.
107. Schnabel R, Fijten R, Smolinska A, et al. Analysis of volatile organic compounds in exhaled breath to diagnose ventilator-associated pneumonia. *Scientific reports* 2015; **5**: 17179.
108. Allers M, Langejuergen J, Gaida A, et al. Measurement of exhaled volatile organic compounds from patients with chronic obstructive pulmonary disease (COPD) using closed gas loop GC-IMS and GC-APCI-MS. *Journal of breath research* 2016; **10**(2): 026004.
109. Martinez-Lozano Sinues P, Meier L, Berchtold C, et al. Breath analysis in real time by mass spectrometry in chronic obstructive pulmonary disease. *Respiration* 2014; **87**(4): 301-10.
110. Westhoff M, Litterst P, Maddula S, et al. Differentiation of chronic obstructive pulmonary disease (COPD) including lung cancer from healthy control group by breath analysis using ion mobility spectrometry. *International Journal for Ion Mobility Spectrometry* 2010; **13**(3-4): 131-9.
111. Van Berkel JJ, Dallinga JW, Moller GM, et al. A profile of volatile organic compounds in breath discriminates COPD patients from controls. *Respir Med* 2010; **104**(4): 557-63.
112. Cazzola M, Segreti A, Bergamini A, et al. Analysis of exhaled breath fingerprints and volatile organic compounds in COPD. *COPD Research and Practice* 2015; **1**(1).
113. Paredi P, Kharitonov SA, Barnes PJ. Elevation of exhaled ethane concentration in asthma. *Am J Respir Crit Care Med* 2000; **162**(4 Pt 1): 1450-4.
114. Cazzola M, Segreti A, Capuano R, et al. Analysis of exhaled breath fingerprints and volatile organic compounds in COPD. *COPD Research and Practice* 2015; **1**(1): 7.
